# Supplementary material
Source: PubMed Central journal article supplement (PMC4832054)
Supplement: supp_kwv294_kwv294supp.pdf [file supp_kwv294_kwv294supp.pdf]

**Web Figure 1.** Forest plot of the mean difference in high-density lipoprotein cholesterol (mean in adenoma cases – mean in adenoma-free controls), Asia, 2000-2014. Squares represent study-specific estimates and are proportional in size to the weight from random-effects meta-analysis (larger squares indicate more weight). Horizontal lines represent 95% confidence intervals (CI).  $I^2$  (CI) = 46% (0%, 73%) and  $z = -7.40$  ( $P < 0.001$ ).

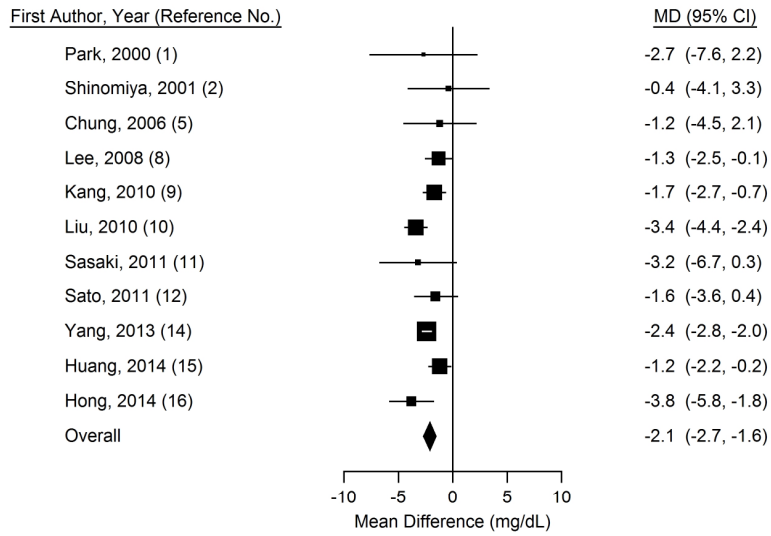

**Web Figure 2.** Forest plot of the mean difference in low-density lipoprotein cholesterol (mean in adenoma cases – mean in adenoma-free controls), Asia, 2000-2014. Squares represent study-specific estimates and are proportional in size to the weight from random-effects meta-analysis (larger squares indicate more weight). Horizontal lines represent 95% confidence intervals (CI).  $I^2$  (CI) = 5% (0%, 72%) and  $z = 2.08$  ( $P = 0.04$ ).

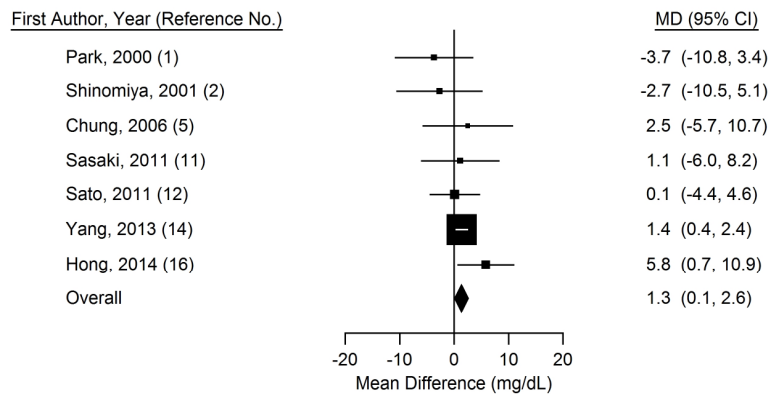

**Web Figure 3.** Forest plot of the mean difference in triglycerides (mean in adenoma cases – mean in adenoma-free controls), Asia, 2000-2014. Squares represent study-specific estimates and are proportional in size to the weight from random-effects meta-analysis (larger squares indicate more weight). Horizontal lines represent 95% confidence intervals (CI).  $I^2$  (CI) = 83% (73%, 89%) and  $z = 6.25$  ( $P < 0.001$ ).

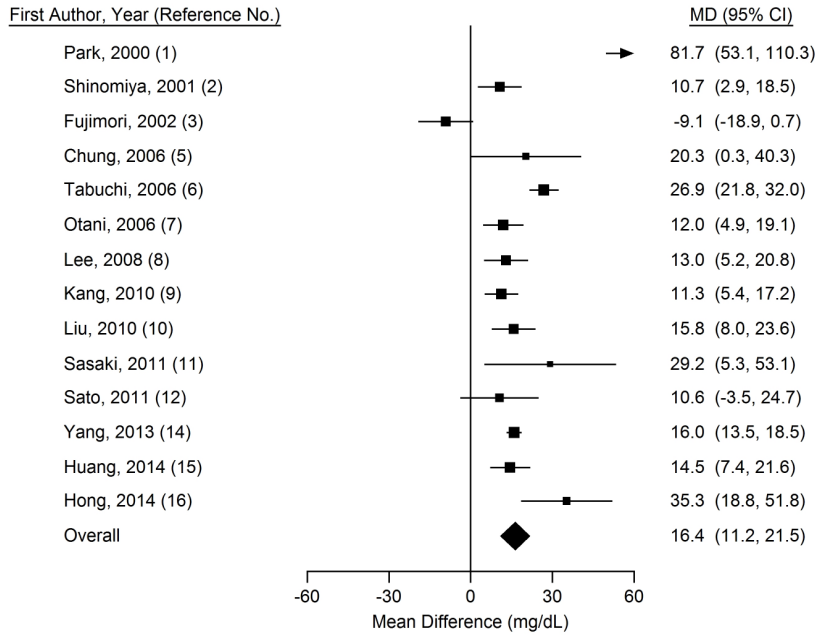

**Web Figure 4.** Forest plot of the mean difference in total cholesterol (mean in adenoma cases – mean in adenoma-free controls), Asia, 2000-2014. Squares represent study-specific estimates and are proportional in size to the weight from random-effects meta-analysis (larger squares indicate more weight). Horizontal lines represent 95% confidence intervals (CI).  $I^2$  (CI) = 78% (62%, 87%) and  $z = 2.13$  ( $P = 0.04$ ).

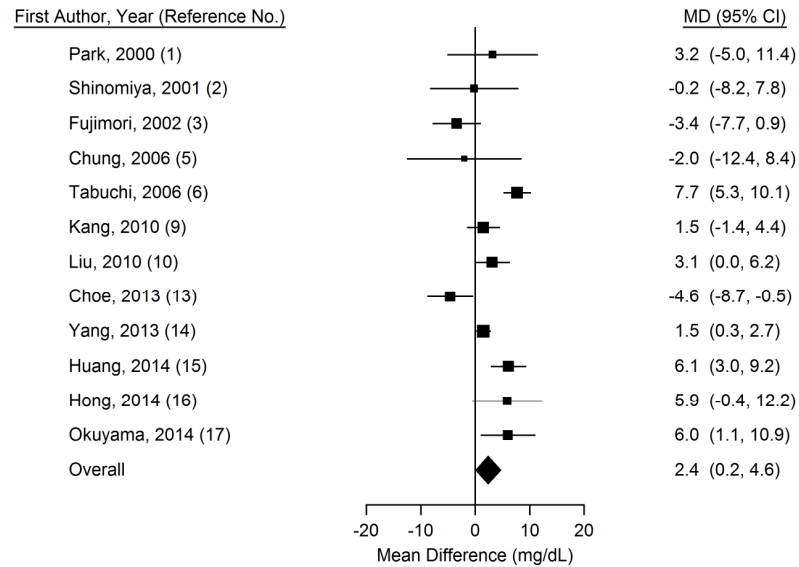

**Web Table 1.** Study-specific means and standard deviations (SD) for cholesterol values at time of colonoscopy stratified by colorectal adenoma case-control status, Asia, 2000-2014

| First Author, Year<br>(Reference No.) | HDL (mg/dL) |    |       |    | LDL (mg/dL) |    |       |     | TG (mg/dL) |     |       |     | TC (mg/dL) |    |       |    |
|---------------------------------------|-------------|----|-------|----|-------------|----|-------|-----|------------|-----|-------|-----|------------|----|-------|----|
|                                       | Controls    |    | Cases |    | Controls    |    | Cases |     | Controls   |     | Cases |     | Controls   |    | Cases |    |
|                                       | Mean        | SD | Mean  | SD | Mean        | SD | Mean  | SD  | Mean       | SD  | Mean  | SD  | Mean       | SD | Mean  | SD |
| Park, 2000 (1)                        | 53          | 25 | 50    | 15 | 109         | 33 | 105   | 206 | 148        | 85  | 229   | 147 | 187        | 35 | 190   | 34 |
| Shinomiya, 2001 (2)                   | 59          | 15 | 58    | 21 | 117         | 32 | 114   | 46  | 113        | 42  | 124   | 38  | 200        | 33 | 200   | 46 |
| Fujimori, 2002 (3)                    | --          | -- | --    | -- | --          | -- | --    | --  | 152        | 80  | 142   | 73  | 200        | 35 | 197   | 33 |
| Morita, 2005 (4)                      | --          | -- | --    | -- | --          | -- | --    | --  | --         | --  | --    | --  | --         | -- | --    | -- |
| Chung, 2006 (5)                       | 48          | 12 | 47    | 13 | 117         | 30 | 119   | 31  | 131        | 69  | 151   | 79  | 200        | 37 | 198   | 40 |
| Tabuchi, 2006 (6)                     | --          | -- | --    | -- | --          | -- | --    | --  | 109        | 71  | 136   | 82  | 200        | 34 | 207   | 29 |
| Otani, 2006 (7)                       | --          | -- | --    | -- | --          | -- | --    | --  | 101        | 71  | 113   | 71  | --         | -- | --    | -- |
| Lee, 2008 (8)                         | 52          | 12 | 50    | 12 | --          | -- | --    | --  | 132        | 78  | 145   | 87  | --         | -- | --    | -- |
| Kang, 2010 (9)                        | 53          | 13 | 51    | 13 | --          | -- | --    | --  | 113        | 68  | 125   | 74  | 195        | 35 | 197   | 34 |
| Liu, 2010 (10)                        | 45          | 13 | 42    | 12 | --          | -- | --    | --  | 115        | 89  | 131   | 97  | 199        | 38 | 202   | 40 |
| Sasaki, 2011 (11)                     | 63          | 16 | 60    | 16 | 131         | 33 | 132   | 30  | 136        | 112 | 165   | 105 | --         | -- | --    | -- |
| Sato, 2011 (12)                       | 59          | 15 | 57    | 14 | 130         | 32 | 130   | 32  | 163        | 106 | 174   | 97  | --         | -- | --    | -- |
| Choe, 2013 (13)                       | --          | -- | --    | -- | --          | -- | --    | --  | --         | --  | --    | --  | 198        | 36 | 193   | 35 |
| Yang, 2013 (14)                       | 55          | 12 | 52    | 15 | 124         | 35 | 126   | 30  | 128        | 81  | 144   | 89  | 196        | 35 | 198   | 37 |
| Huang, 2014 (15)                      | 48          | 13 | 46    | 13 | --          | -- | --    | --  | 129        | 81  | 143   | 89  | 197        | 37 | 203   | 38 |
| Hong, 2014 (16)                       | 52          | 14 | 48    | 12 | 113         | 32 | 119   | 34  | 117        | 85  | 153   | 118 | 187        | 38 | 193   | 43 |
| Okuyama, 2014 (17)                    | --          | -- | --    | -- | --          | -- | --    | --  | --         | --  | --    | --  | 220        | 34 | 226   | 38 |

Abbreviations: HDL, high-density lipoprotein cholesterol; LDL, low-density lipoprotein cholesterol; SD, standard deviation; TC, total cholesterol; TG, triglycerides.

**Web Table 2.** Stratified random-effects meta-analysis for mean difference (mean in cases – mean in controls) in blood lipid measurements between adenoma cases and adenoma-free controls, Asia, 2000-2014

| Characteristic                                        | HDL (mg/dL) |      |            |        | LDL (mg/dL) |      |           |       | TG (mg/dL) |      |            |        | TC (mg/dL) |      |            |        |
|-------------------------------------------------------|-------------|------|------------|--------|-------------|------|-----------|-------|------------|------|------------|--------|------------|------|------------|--------|
|                                                       | N           | MD   | 95% CI     | P      | N           | MD   | 95% CI    | P     | N          | MD   | 95% CI     | P      | N          | MD   | 95% CI     | P      |
| <b>All studies</b>                                    | 11          | -2.1 | -2.7, -1.6 | <0.001 | 7           | 1.3  | 0.8, 2.6  | 0.04  | 14         | 16.4 | 11.2, 21.5 | <0.001 | 12         | 2.4  | 0.2, 4.6   | 0.04   |
| <b>Country</b>                                        |             |      |            |        |             |      |           |       |            |      |            |        |            |      |            |        |
| China/Taiwan                                          | 2           | -2.3 | -4.5, -0.1 | 0.04   | 0           | --   |           | --    | 2          | 15.1 | 9.8, 20.3  | <0.001 | 2          | 4.6  | 1.7, 7.5   | 0.002  |
| Japan                                                 | 3           | -1.7 | -3.3, -0.1 | 0.03   | 3           | -0.2 | -3.6, 3.2 | 0.91  | 6          | 12.6 | 1.3, 23.9  | 0.03   | 4          | 2.8  | -3.1, 8.7  | 0.35   |
| Korea                                                 | 6           | -2.1 | -2.7, -1.5 | <0.001 | 4           | 1.7  | -1.1, 4.6 | 0.23  | 6          | 21.6 | 13.1, 30.0 | <0.001 | 6          | 0.8  | -1.6, 3.2  | 0.50   |
| <b>Year of colonoscopy (mid-point)</b>                |             |      |            |        |             |      |           |       |            |      |            |        |            |      |            |        |
| Before 2005                                           | 3           | -1.2 | -3.4, 1.0  | 0.28   | 3           | -1.6 | -6.0, 2.8 | 0.48  | 6          | 19.5 | 5.7, 33.3  | <0.001 | 6          | 2.4  | -2.3, 7.1  | 0.32   |
| 2005 or after                                         | 8           | -2.2 | -2.8, -1.6 | <0.001 | 8           | 1.5  | 0.3, 2.8  | 0.01  | 8          | 15.2 | 12.1, 18.3 | <0.001 | 6          | 2.1  | -0.3, 4.5  | 0.08   |
| <b>Sample size</b>                                    |             |      |            |        |             |      |           |       |            |      |            |        |            |      |            |        |
| Less than 500 adenoma cases                           | 6           | -2.4 | -3.5, -1.3 | <0.001 | 6           | 1.0  | -1.9, 3.8 | 0.51  | 6          | 28.3 | 12.4, 44.2 | <0.001 | 5          | 4.0  | 0.9, 7.1   | 0.01   |
| 500 or more adenoma cases                             | 5           | -2.1 | -2.8, -1.3 | <0.001 | 1           | 1.4  | 0.4, 2.4  | 0.005 | 8          | 13.2 | 7.9, 18.6  | <0.001 | 7          | 2.0  | -0.8, 4.8  | 0.16   |
| <b>Study design</b>                                   |             |      |            |        |             |      |           |       |            |      |            |        |            |      |            |        |
| Unadjusted mean and unmatched design                  | 7           | -2.3 | -3.0, -1.6 | <0.001 | 4           | 1.5  | 0.3, 2.8  | 0.01  | 8          | 18.5 | 13.7, 23.4 | <0.001 | 6          | 4.8  | 2.1, 7.6   | <0.001 |
| Adjusted mean or matched design                       | 4           | -1.6 | -2.5, -0.7 | <0.001 | 3           | -1.6 | -6.0, 2.8 | 0.48  | 6          | 15.1 | 3.8, 26.4  | 0.009  | 6          | -1.2 | -3.9, 1.5  | 0.39   |
| <b>Excluded personal history of colorectal polyps</b> |             |      |            |        |             |      |           |       |            |      |            |        |            |      |            |        |
| Yes                                                   | 8           | -2.1 | -2.9, -1.3 | <0.001 | 4           | 1.6  | -1.9, 5.0 | 0.38  | 10         | 12.4 | 7.3, 17.6  | <0.001 | 7          | 1.3  | -1.9, 4.4  | 0.43   |
| No                                                    | 3           | -2.4 | -2.8, -2.0 | <0.001 | 3           | 1.3  | 0.0, 2.5  | 0.05  | 4          | 28.7 | 16.1, 41.2 | <0.001 | 5          | 4.0  | 0.1, 7.9   | 0.05   |
| <b>Excluded personal history of colorectal cancer</b> |             |      |            |        |             |      |           |       |            |      |            |        |            |      |            |        |
| Yes                                                   | 11          | -2.1 | -2.7, -1.6 | <0.001 | 7           | 1.3  | 0.8, 2.6  | 0.04  | 13         | 18.0 | 13.4, 22.4 | <0.001 | 10         | 2.7  | 0.3, 5.0   | 0.03   |
| No                                                    | 0           | --   | --         | --     | 0           | --   | --        | --    | 1          | -9.1 | -18.9, 0.7 | 0.07   | 2          | 1.2  | -8.0, 10.4 | 0.79   |

Abbreviations: CI, confidence interval; HDL, high-density lipoprotein cholesterol; LDL, low-density lipoprotein cholesterol; MD, mean difference; TC, total cholesterol; TG, triglycerides.

**Web Figure 5.** Funnel plots for the mean difference (mean in adenoma cases – mean in adenoma-free controls) for high-density lipoprotein cholesterol (A), low-density lipoprotein cholesterol (B), triglycerides (C), and total cholesterol (D), Asia, 2000-2014. *P*-value shown is for non-parametric test of asymmetry.

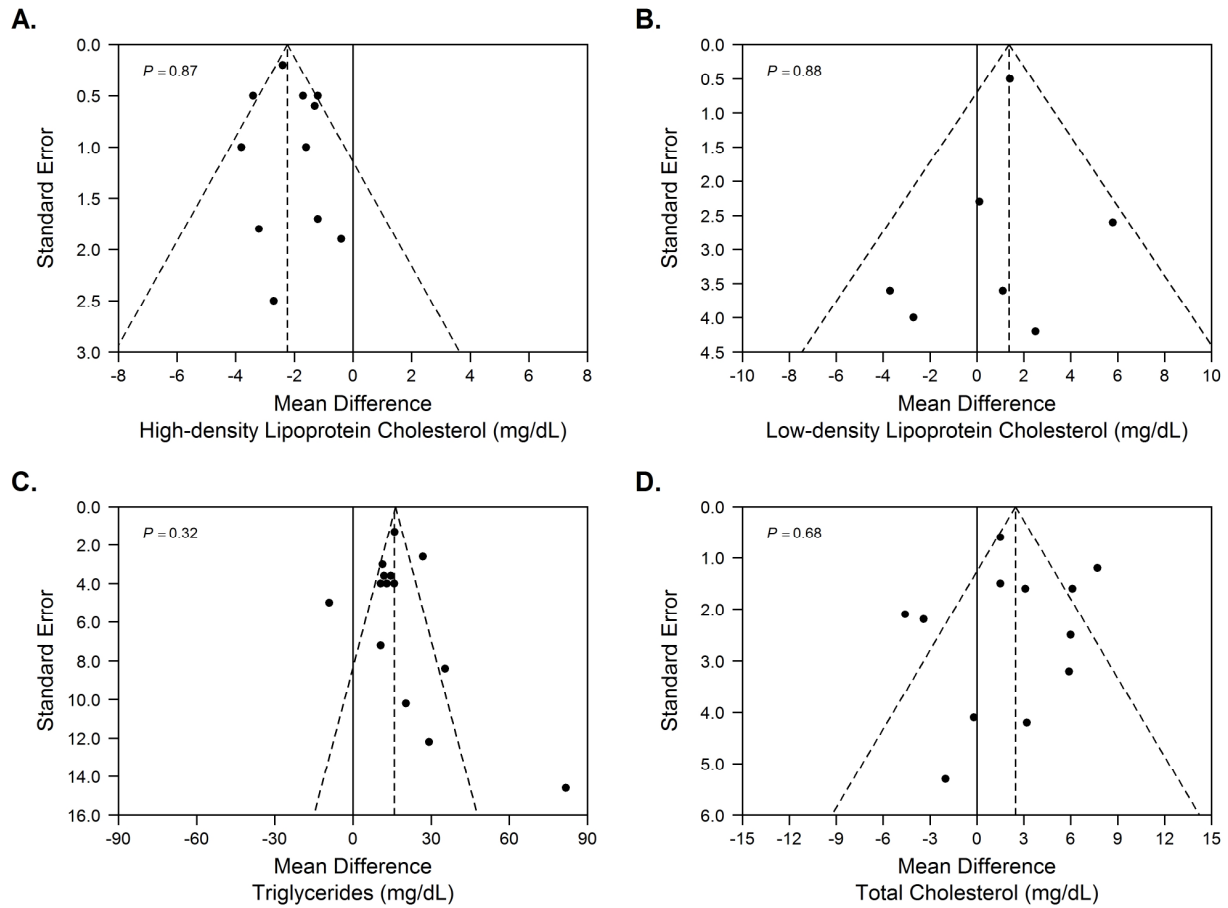

**Web Table 3.** Leave-one-out random-effects meta-analysis for mean differences (mean in cases – mean in controls) in blood lipid measurements between adenoma cases and adenoma-free controls, Asia, 2000-2014

| First Author, Year<br>(Reference No.) | HDL (mg/dL) |            |        | LDL (mg/dL) |           |       | TG (mg/dL) |            |        | TC (mg/dL) |           |       |
|---------------------------------------|-------------|------------|--------|-------------|-----------|-------|------------|------------|--------|------------|-----------|-------|
|                                       | MD          | 95% CI     | P      | MD          | 95% CI    | P     | MD         | 95% CI     | P      | MD         | 95% CI    | P     |
| None                                  | -2.1        | -2.7, -1.6 | <0.001 | 1.3         | 0.8, 2.6  | 0.04  | 16.4       | 11.2, 21.5 | <0.001 | 2.4        | 0.2, 4.6  | 0.04  |
| Park, 2000 (1)                        | -2.1        | -2.7, -1.5 | <0.001 | 1.4         | 0.5, 2.4  | 0.002 | 14.6       | 10.0, 19.2 | <0.001 | 2.3        | 0.0, 4.7  | 0.05  |
| Shinomiya, 2001 (2)                   | -2.2        | -2.7, -1.6 | <0.001 | 1.4         | 0.2, 2.7  | 0.03  | 17.0       | 11.5, 22.5 | <0.001 | 2.5        | 0.2, 4.8  | 0.03  |
| Fujimori, 2002 (3)                    | --          | --         | --     | --          | --        | --    | 17.9       | 13.4, 22.4 | <0.001 | 3.0        | 0.7, 5.2  | 0.01  |
| Morita, 2005 (4)                      | --          | --         | --     | --          | --        | --    | --         | --         | --     | --         | --        | --    |
| Chung, 2006 (5)                       | -2.1        | -2.7, -1.6 | <0.001 | 1.2         | -0.6, 3.0 | 0.21  | 16.2       | 10.9, 21.5 | <0.001 | 2.5        | 0.3, 4.8  | 0.03  |
| Tabuchi, 2006 (6)                     | --          | --         | --     | --          | --        | --    | 15.0       | 9.9, 20.1  | <0.001 | 1.7        | -0.3, 3.7 | 0.09  |
| Otani, 2006 (7)                       | --          | --         | --     | --          | --        | --    | 16.9       | 11.3, 22.5 | <0.001 | --         | --        | --    |
| Lee, 2008 (8)                         | -2.2        | -2.8, -1.6 | <0.001 | --          | --        | --    | 16.8       | 11.2, 22.4 | <0.001 | --         | --        | --    |
| Kang, 2010 (9)                        | -2.2        | -2.8, -1.6 | <0.001 | --          | --        | --    | 17.0       | 11.4, 22.7 | <0.001 | 2.5        | 0.0, 5.0  | 0.05  |
| Liu, 2010 (10)                        | -1.9        | -2.4, -1.4 | <0.001 | --          | --        | --    | 16.6       | 11.0, 22.1 | <0.001 | 2.3        | -0.2, 4.8 | 0.07  |
| Sasaki, 2011 (11)                     | -2.1        | -2.7, -1.5 | <0.001 | 1.2         | -0.6, 3.1 | 0.20  | 16.0       | 10.7, 21.2 | <0.001 | --         | --        | --    |
| Sato, 2011 (12)                       | -2.2        | -2.8, -1.6 | <0.001 | 1.4         | -0.5, 3.3 | 0.16  | 16.8       | 11.4, 22.1 | <0.001 | --         | --        | --    |
| Choe, 2013 (13)                       | --          | --         | --     | --          | --        | --    | --         | --         | --     | 3.1        | 1.0, 5.2  | 0.004 |
| Yang, 2013 (14)                       | -2.0        | -2.8, -1.3 | <0.001 | 1.0         | -1.9, 3.8 | 0.51  | 17.1       | 10.6, 23.6 | <0.001 | 2.4        | -0.3, 5.2 | 0.08  |
| Huang, 2014 (15)                      | -2.3        | -2.8, -1.7 | <0.001 | --          | --        | --    | 16.7       | 11.1, 22.3 | <0.001 | 2.0        | -0.4, 4.3 | 0.10  |
| Hong, 2014 (16)                       | -2.0        | -2.6, -1.5 | <0.001 | 1.2         | 0.3, 2.1  | 0.01  | 15.3       | 10.2, 20.5 | <0.001 | 2.1        | -0.2, 4.5 | 0.07  |
| Okuyama, 2014 (17)                    | --          | --         | --     | --          | --        | --    | --         | --         | --     | 2.1        | -0.3, 4.4 | 0.08  |

Abbreviations: CI, confidence interval; HDL, high-density lipoprotein cholesterol; LDL, low-density lipoprotein cholesterol; MD, mean difference; TC, total cholesterol; TG, triglycerides.



**Web Figure 6.** Adjusted odds ratios for adenomas according to high-density lipoprotein cholesterol (A), low-density lipoprotein cholesterol (B), triglycerides (C), and total cholesterol (D), Asia, 2000-2014. The size of the circle is proportional to the inverse variance of the estimate (larger is more precise).

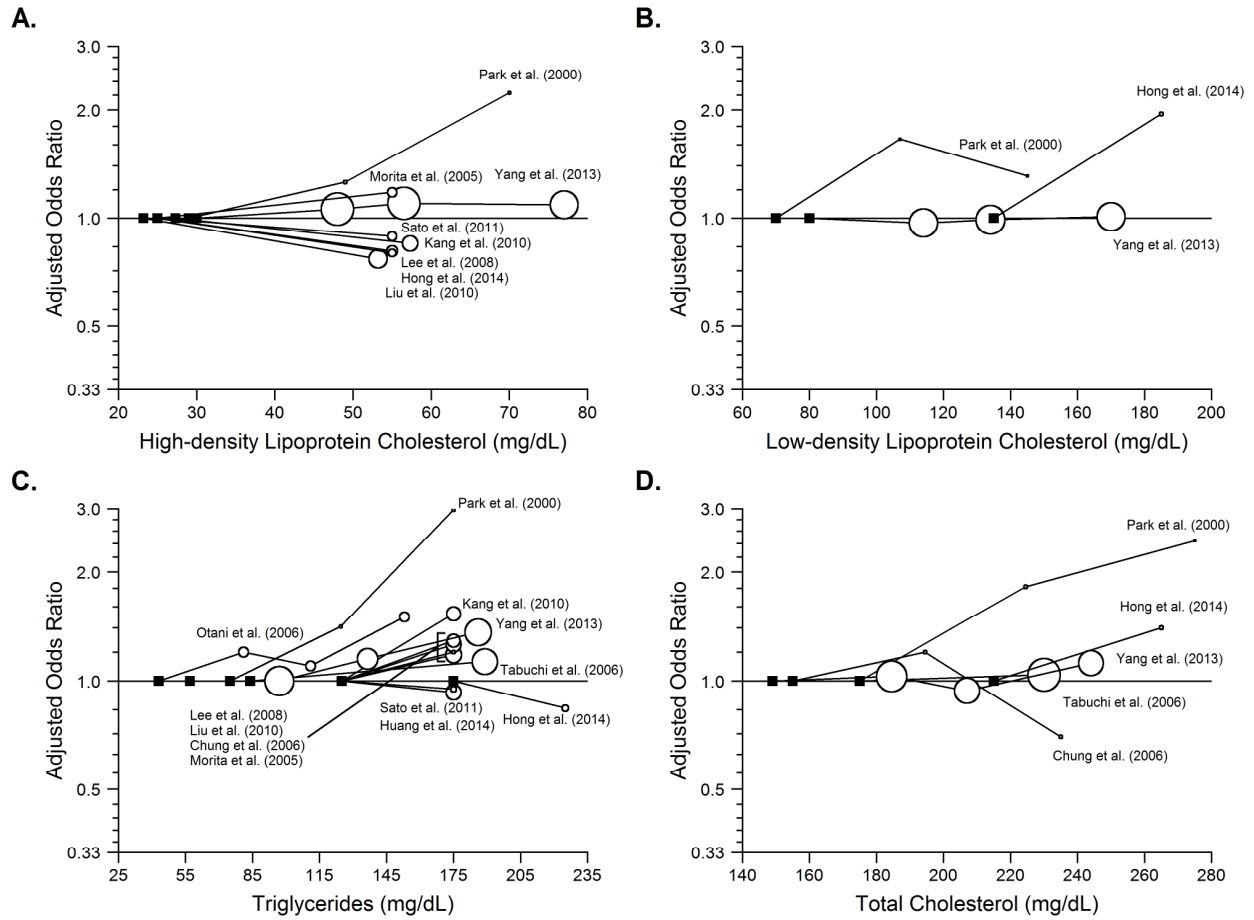

**Web Table 4.** Stratified random-effects meta-analysis for trend-estimated odds ratios of adenomas for blood lipid measurements, Asia, 2000-2014

| Characteristic                                        | HDL (+10 mg/dL) |      |            |       | LDL (+20 mg/dL) |      |            |      | TG (+40 mg/dL) |      |            |       | TC (+20 mg/dL) |      |            |      |
|-------------------------------------------------------|-----------------|------|------------|-------|-----------------|------|------------|------|----------------|------|------------|-------|----------------|------|------------|------|
|                                                       | N               | OR   | 95% CI     | P     | N               | OR   | 95% CI     | P    | N              | OR   | 95% CI     | P     | N              | OR   | 95% CI     | P    |
| <b>All studies</b>                                    | 8               | 0.96 | 0.92, 1.00 | 0.04  | 3               | 1.08 | 0.92, 1.28 | 0.36 | 12             | 1.13 | 1.05, 1.21 | 0.001 | 5              | 1.03 | 0.98, 1.07 | 0.23 |
| <b>Country</b>                                        |                 |      |            |       |                 |      |            |      |                |      |            |       |                |      |            |      |
| China/Taiwan                                          | 1               | 0.92 | 0.87, 0.97 | 0.002 | 0               | --   | --         | --   | 2              | 1.07 | 0.84, 1.35 | 0.60  | 0              | --   | --         | --   |
| Japan                                                 | 2               | 1.01 | 0.92, 1.11 | 0.84  | 0               | --   | --         | --   | 4              | 1.08 | 1.02, 1.15 | 0.006 | 1              | 1.02 | 0.98, 1.07 | 0.35 |
| Korea                                                 | 5               | 0.96 | 0.92, 1.00 | 0.08  | 3               | 1.08 | 0.92, 1.28 | 0.36 | 6              | 1.20 | 1.05, 1.37 | 0.008 | 4              | 1.03 | 0.95, 1.12 | 0.44 |
| <b>Year of colonoscopy (mid-point)</b>                |                 |      |            |       |                 |      |            |      |                |      |            |       |                |      |            |      |
| Before 2005                                           | 2               | 1.07 | 0.96, 1.19 | 0.21  | 1               | 1.07 | 0.71, 1.63 | 0.36 | 5              | 1.09 | 1.03, 1.15 | 0.003 | 3              | 1.02 | 0.98, 1.07 | 0.32 |
| 2005 or after                                         | 6               | 0.94 | 0.91, 0.97 | 0.001 | 2               | 1.11 | 0.86, 1.42 | 0.43 | 7              | 1.12 | 1.00, 1.27 | 0.05  | 2              | 1.03 | 0.94, 1.13 | 0.49 |
| <b>Sample size</b>                                    |                 |      |            |       |                 |      |            |      |                |      |            |       |                |      |            |      |
| Less than 500 adenoma cases                           | 3               | 0.96 | 0.88, 1.05 | 0.39  | 2               | 1.23 | 0.98, 1.55 | 0.08 | 4              | 1.03 | 0.82, 1.29 | 0.81  | 3              | 1.17 | 0.83, 1.65 | 0.37 |
| 500 or more adenoma cases                             | 5               | 0.96 | 0.92, 1.01 | 0.12  | 1               | 1.00 | 0.91, 1.10 | 0.95 | 8              | 1.14 | 1.05, 1.23 | 0.001 | 2              | 1.05 | 0.96, 1.14 | 0.31 |
| <b>Study design</b>                                   |                 |      |            |       |                 |      |            |      |                |      |            |       |                |      |            |      |
| Crude OR only                                         | 0               | --   | --         | --    | 0               | --   | --         | --   | 0              | --   | --         | --    | 0              | --   | --         | --   |
| Covariate-adjusted OR                                 | 8               | 0.96 | 0.92, 1.00 | 0.04  | 3               | 1.08 | 0.92, 1.28 | 0.36 | 12             | 1.13 | 1.05, 1.21 | 0.001 | 5              | 1.03 | 0.98, 1.07 | 0.23 |
| <b>Excluded personal history of colorectal polyps</b> |                 |      |            |       |                 |      |            |      |                |      |            |       |                |      |            |      |
| Yes                                                   | 6               | 0.95 | 0.91, 0.98 | 0.002 | 1               | 1.30 | 0.99, 1.72 | 0.06 | 8              | 1.13 | 1.02, 1.26 | 0.02  | 1              | 1.14 | 0.87, 1.50 | 0.33 |
| No                                                    | 2               | 1.03 | 0.94, 1.13 | 0.51  | 2               | 1.01 | 0.92, 1.10 | 0.89 | 4              | 1.08 | 1.02, 1.15 | 0.007 | 4              | 1.02 | 0.98, 1.07 | 0.29 |
| <b>Excluded personal history of colorectal cancer</b> |                 |      |            |       |                 |      |            |      |                |      |            |       |                |      |            |      |
| Yes                                                   | 8               | 0.96 | 0.92, 1.00 | 0.04  | 3               | 1.08 | 0.92, 1.28 | 0.36 | 12             | 1.13 | 1.05, 1.21 | 0.001 | 5              | 1.03 | 0.98, 1.07 | 0.23 |
| No                                                    | 0               | --   | --         | --    | 0               | --   | --         | --   | 0              | --   | --         | --    | 0              | --   | --         | --   |

Abbreviations: CI, confidence interval; HDL, high-density lipoprotein cholesterol; LDL, low-density lipoprotein cholesterol; OR, odds ratio; TC, total cholesterol; TG, triglycerides.

**Web Figure 7.** Funnel plots for trend-estimated odds ratios of adenomas for high-density lipoprotein cholesterol (A), low-density lipoprotein cholesterol (B), triglycerides (C), and total cholesterol (D), Asia, 2000-2014. *P*-value shown is for non-parametric test of asymmetry.

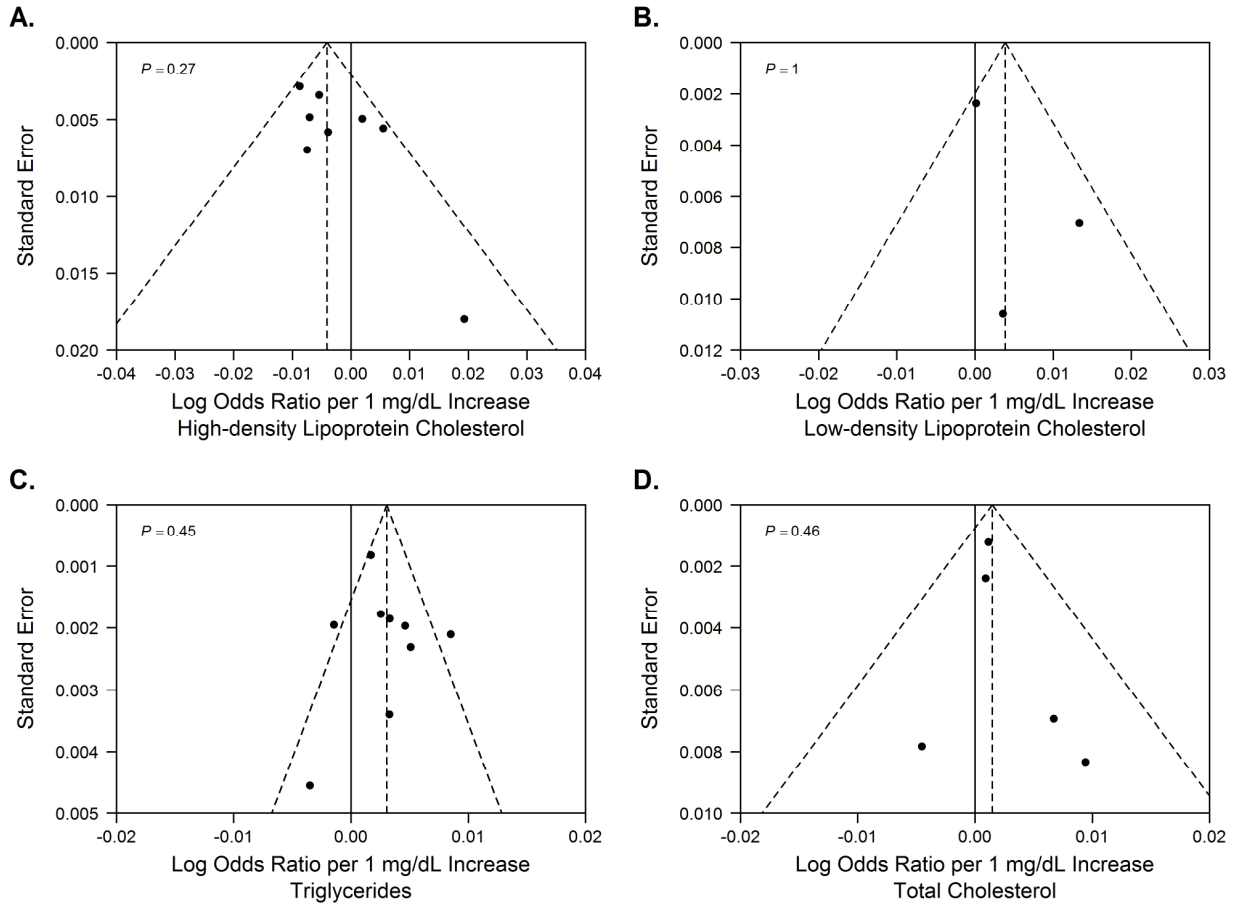

**Web Table 5.** Leave-one-out random-effects meta-analysis for trend-estimated odds ratios of adenomas for blood lipid measurements, Asia, 2000-2014

| First Author, Year<br>(Reference No.) | HDL (+10 mg/dL) |            |       | LDL (+20 mg/dL) |            |      | TG (+40 mg/dL) |            |        | TC (+20 mg/dL) |            |      |
|---------------------------------------|-----------------|------------|-------|-----------------|------------|------|----------------|------------|--------|----------------|------------|------|
|                                       | OR              | 95% CI     | P     | OR              | 95% CI     | P    | OR             | 95% CI     | P      | OR             | 95% CI     | P    |
| None                                  | 0.96            | 0.92, 1.00 | 0.04  | 1.08            | 0.92, 1.28 | 0.36 | 1.13           | 1.05, 1.21 | 0.001  | 1.03           | 0.98, 1.07 | 0.23 |
| Park, 2000 (1)                        | 0.96            | 0.92, 0.99 | 0.02  | 1.05            | 0.93, 1.19 | 0.43 | 1.12           | 1.04, 1.20 | 0.002  | 1.05           | 0.96, 1.14 | 0.29 |
| Shinomiya, 2001 (2)                   | --              | --         | --    | --              | --         | --   | --             | --         | --     | --             | --         | --   |
| Fujimori, 2002 (3)                    | --              | --         | --    | --              | --         | --   | --             | --         | --     | --             | --         | --   |
| Morita, 2005 (4)                      | 0.94            | 0.91, 0.98 | 0.001 | --              | --         | --   | 1.13           | 1.05, 1.21 | 0.004  | --             | --         | --   |
| Chung, 2006 (5)                       | --              | --         | --    | --              | --         | --   | 1.13           | 1.05, 1.21 | 0.001  | 1.06           | 0.97, 1.15 | 0.20 |
| Tabuchi, 2006 (6)                     | --              | --         | --    | --              | --         | --   | 1.14           | 1.05, 1.24 | 0.003  | 1.07           | 0.90, 1.25 | 0.44 |
| Otani, 2006 (7)                       | --              | --         | --    | --              | --         | --   | 1.13           | 1.04, 1.21 | 0.002  | --             | --         | --   |
| Lee, 2008 (8)                         | 0.97            | 0.92, 1.01 | 0.14  | --              | --         | --   | 1.11           | 1.04, 1.20 | 0.004  | --             | --         | --   |
| Kang, 2010 (9)                        | 0.97            | 0.92, 1.02 | 0.18  | --              | --         | --   | 1.09           | 1.04, 1.15 | 0.001  | --             | --         | --   |
| Liu, 2010 (10)                        | 0.97            | 0.93, 1.01 | 0.19  | --              | --         | --   | 1.12           | 1.03, 1.21 | 0.005  | --             | --         | --   |
| Sasaki, 2011 (11)                     | --              | --         | --    | --              | --         | --   | --             | --         | --     | --             | --         | --   |
| Sato, 2011 (12)                       | 0.96            | 0.92, 1.01 | 0.09  | --              | --         | --   | 1.13           | 1.05, 1.22 | 0.001  | --             | --         | --   |
| Choe, 2013 (13)                       | --              | --         | --    | --              | --         | --   | --             | --         | --     | --             | --         | --   |
| Yang, 2013 (14)                       | 0.95            | 0.92, 0.99 | 0.01  | 1.11            | 0.99, 1.24 | 0.08 | 1.13           | 1.04, 1.23 | 0.003  | 1.06           | 0.96, 1.16 | 0.25 |
| Huang, 2014 (15)                      | --              | --         | --    | --              | --         | --   | 1.15           | 1.07, 1.23 | <0.001 | --             | --         | --   |
| Hong, 2014 (16)                       | 0.96            | 0.92, 1.01 | 0.10  | 1.00            | 0.96, 1.05 | 0.89 | 1.14           | 1.06, 1.22 | <0.001 | 1.05           | 0.96, 1.14 | 0.29 |
| Okuyama, 2014 (17)                    | --              | --         | --    | --              | --         | --   | --             | --         | --     | --             | --         | --   |

Abbreviations: CI, confidence interval; HDL, high-density lipoprotein cholesterol; LDL, low-density lipoprotein cholesterol; OR, odds ratio; TC, total cholesterol; TG, triglycerides.

## REFERENCES

1. Park SK, Joo JS, Kim DH, et al. Association of serum lipids and glucose with the risk of colorectal adenomatous polyp in men: a case-control study in Korea. *J Korean Med Sci* 2000;15(6):690-695.
2. Shinomiya S, Sasaki J, Kiyohara C, et al. Apolipoprotein E genotype, serum lipids, and colorectal adenomas in Japanese men. *Cancer Lett* 2001;164(1):33-40.
3. Fujimori S, Kishida T, Mitsui K, et al. Influence of alcohol consumption on the association between serum lipids and colorectal adenomas. *Scand J Gastroenterol* 2002;37(11):1309-1312.
4. Morita T, Tabata S, Mineshita M, et al. The metabolic syndrome is associated with increased risk of colorectal adenoma development: the Self-Defense Forces health study. *Asian Pac J Cancer Prev* 2005;6(4):485-489.
5. Chung YW, Han DS, Park YK, et al. Association of obesity, serum glucose and lipids with the risk of advanced colorectal adenoma and cancer: a case-control study in Korea. *Dig Liver Dis* 2006;38(9):668-672.
6. Tabuchi M, Kitayama J, Nagawa H. Hypertriglyceridemia is positively correlated with the development of colorectal tubular adenoma in Japanese men. *World J Gastroenterol* 2006;12(8):1261-1264.
7. Otani T, Iwasaki M, Ikeda S, et al. Serum triglycerides and colorectal adenoma in a case-control study among cancer screening examinees (Japan). *Cancer Causes Control* 2006;17(10):1245-1252.
8. Lee GE, Park HS, Yun KE, et al. Association between BMI and metabolic syndrome and adenomatous colonic polyps in Korean men. *Obesity (Silver Spring)* 2008;16(6):1434-1439.
9. Kang HW, Kim D, Kim HJ, et al. Visceral obesity and insulin resistance as risk factors for colorectal adenoma: a cross-sectional, case-control study. *Am J Gastroenterol* 2010;105(1):178-187.
10. Liu CS, Hsu HS, Li CI, et al. Central obesity and atherogenic dyslipidemia in metabolic syndrome are associated with increased risk for colorectal adenoma in a Chinese population [published online May 27, 2010]. *BMC Gastroenterol* (doi: 10.1186/1471-230X-10-51).
11. Sasaki Y, Takeda H, Sato T, et al. Increased levels of serum glucose-dependent insulinotropic polypeptide as a novel risk factor for human colorectal adenoma. *Metabolism* 2011;60(9):1253-1258.
12. Sato T, Takeda H, Sasaki Y, et al. Increased homeostasis model assessment-insulin resistance is a risk factor for colorectal adenoma in Japanese males. *Tohoku J Exp Med* 2011;223(4):297-303.

13. Choe EK, Kim D, Kim HJ, et al. Association of visceral obesity and early colorectal neoplasia. *World J Gastroenterol* 2013;19(45):8349-8356.
14. Yang MH, Rampal S, Sung J, et al. The association of serum lipids with colorectal adenomas. *Am J Gastroenterol* 2013;108(5):833-841.
15. Huang HE, Yang YC, Wu JS, et al. The relationship between different glycemic statuses and colon polyps in a Taiwanese population. *J Gastroenterol* 2014;49(7):1145-1151.
16. Hong SH, Cha JM, Lee JI, et al. Association of hyper-LDL cholesterolemia with increased risk of colorectal adenoma. *Hepatogastroenterology* 2014;61(134):1588-1594.
17. Okuyama Y, Ozasa K, Oki K, et al. Inverse associations between serum concentrations of zeaxanthin and other carotenoids and colorectal neoplasm in Japanese. *Int J Clin Oncol* 2014;19(1):87-97.
